# Supplementary material
Source: publisher figshare collection journal article supplement (https://gsapubs.figshare.com/articles/dataset/_/12534689)
Supplement: Supplementary file 1 [file 1]

GSA Data Repository Item 2017077

Zeming, Z., Hua, X., Huixia, D., Xin, D., Zhengbin, G., Zhulin, T., and Santosh, M., 2016, Miocene orbicular diorite in east-central Himalaya: Anatexis, melt mixing and fractional crystallization of the Greater Himalayan Sequence: GSA Bulletin, doi:10.1130/B31586.1.

## **DATA REPOSITORY TABLES**

Table DR1. Chemical compositions of the plagioclases from the diorite and schist.

Table DR2. Chemical compositions of the biotites from the diorite and schist.

Table DR3. Chemical compositions of K-feldspar, garnet, cordierite and sillimenite from the diorite and schist.

Table DR4. Zircon U-Pb dating and REE data.

Table DR5. The Hf isotopic data of zircons.

Table DR3. Chemical compositions of K-feldspar, garnet, cordierite and sillimenite from the diorite and schist

| Number   | Point   | Mineral | Structural domain | SiO <sub>2</sub> | TiO <sub>2</sub> | Al <sub>2</sub> O <sub>3</sub> | FeO  | MnO  | MgO  | CaO  | Na <sub>2</sub> O | K <sub>2</sub> O | Total  | Si    | Ti    | Al    | Fe    | Mn    | Mg    | Ca    | Na    | K     | Ab    | An    | Or    |
|----------|---------|---------|-------------------|------------------|------------------|--------------------------------|------|------|------|------|-------------------|------------------|--------|-------|-------|-------|-------|-------|-------|-------|-------|-------|-------|-------|-------|
| Line 2   | 123-2-7 | Kfs     | Outer shell       | 65.48            | 0.01             | 18.18                          | 0.02 | 0.00 | 0.01 | 0.01 | 0.61              | 15.43            | 99.80  | 3.037 | 0.000 | 0.994 | 0.001 | 0.000 | 0.000 | 0.000 | 0.055 | 0.913 | 0.057 | 0.000 | 0.943 |
| Line 3   | 123-2-7 | Kfs     | Outer shell       | 65.34            | 0.00             | 18.58                          | 0.05 | 0.00 | 0.00 | 0.00 | 2.55              | 12.61            | 99.14  | 3.016 | 0.000 | 1.011 | 0.002 | 0.000 | 0.000 | 0.000 | 0.228 | 0.743 | 0.235 | 0.000 | 0.765 |
| Line 8   | 123-2-7 | Kfs     | Outer shell       | 65.77            | 0.03             | 17.66                          | 0.00 | 0.05 | 0.00 | 0.12 | 1.17              | 14.22            | 99.06  | 3.068 | 0.001 | 0.971 | 0.000 | 0.002 | 0.000 | 0.006 | 0.106 | 0.846 | 0.111 | 0.006 | 0.883 |
| Line 9   | 123-2-7 | Kfs     | Outer shell       | 65.58            | 0.03             | 18.04                          | 0.01 | 0.01 | 0.00 | 0.06 | 1.01              | 14.68            | 99.43  | 3.047 | 0.001 | 0.988 | 0.000 | 0.000 | 0.000 | 0.003 | 0.091 | 0.870 | 0.095 | 0.003 | 0.902 |
| Line 10  | 123-2-7 | Kfs     | Outer shell       | 64.69            | 0.03             | 18.53                          | 0.04 | 0.02 | 0.02 | 0.14 | 0.88              | 14.94            | 99.28  | 3.008 | 0.001 | 1.016 | 0.001 | 0.001 | 0.001 | 0.007 | 0.079 | 0.886 | 0.081 | 0.007 | 0.911 |
| Line 12  | 123-2-7 | Kfs     | Outer shell       | 65.34            | 0.02             | 18.38                          | 0.00 | 0.00 | 0.01 | 0.07 | 0.82              | 15.16            | 99.80  | 3.025 | 0.001 | 1.003 | 0.000 | 0.000 | 0.000 | 0.003 | 0.073 | 0.895 | 0.075 | 0.003 | 0.921 |
| Line 13  | 123-2-7 | Kfs     | Outer shell       | 65.06            | 0.02             | 18.48                          | 0.02 | 0.00 | 0.00 | 0.04 | 0.98              | 15.03            | 99.64  | 3.012 | 0.001 | 1.009 | 0.001 | 0.000 | 0.000 | 0.002 | 0.088 | 0.888 | 0.090 | 0.002 | 0.908 |
| Line 16  | 123-2-7 | Kfs     | Outer shell       | 66.16            | 0.04             | 17.69                          | 0.02 | 0.02 | 0.00 | 0.00 | 0.65              | 14.89            | 99.51  | 3.083 | 0.002 | 0.971 | 0.001 | 0.001 | 0.000 | 0.000 | 0.058 | 0.885 | 0.062 | 0.000 | 0.938 |
| Line 18  | 123-2-7 | Kfs     | Outer shell       | 65.13            | 0.00             | 18.09                          | 0.00 | 0.01 | 0.02 | 0.02 | 0.46              | 15.83            | 99.57  | 3.027 | 0.000 | 0.991 | 0.000 | 0.000 | 0.001 | 0.001 | 0.041 | 0.938 | 0.042 | 0.001 | 0.957 |
| Line 19  | 123-2-7 | Kfs     | Outer shell       | 65.18            | 0.00             | 18.14                          | 0.02 | 0.01 | 0.00 | 0.00 | 0.53              | 15.46            | 99.35  | 3.037 | 0.000 | 0.996 | 0.001 | 0.000 | 0.000 | 0.000 | 0.048 | 0.919 | 0.049 | 0.000 | 0.951 |
| Line 39  | 123-2-7 | Kfs     | Outer shell       | 65.08            | 0.02             | 19.02                          | 0.01 | 0.00 | 0.01 | 0.02 | 1.00              | 14.82            | 99.97  | 3.002 | 0.001 | 1.034 | 0.000 | 0.000 | 0.001 | 0.001 | 0.089 | 0.872 | 0.093 | 0.001 | 0.906 |
| Line 40  | 123-2-7 | Kfs     | Outer shell       | 65.58            | 0.02             | 17.63                          | 0.00 | 0.04 | 0.00 | 0.01 | 0.88              | 15.05            | 99.26  | 3.055 | 0.001 | 0.968 | 0.000 | 0.001 | 0.000 | 0.001 | 0.079 | 0.895 | 0.081 | 0.001 | 0.918 |
| Line 59  | 123-2-3 | Kfs     | Outer shell       | 65.39            | 0.00             | 17.77                          | 0.03 | 0.00 | 0.00 | 0.01 | 0.83              | 15.05            | 99.12  | 3.051 | 0.000 | 0.977 | 0.001 | 0.000 | 0.000 | 0.000 | 0.075 | 0.895 | 0.077 | 0.000 | 0.923 |
| Line 60  | 123-2-3 | Kfs     | Outer shell       | 65.64            | 0.00             | 17.99                          | 0.00 | 0.00 | 0.00 | 0.02 | 1.02              | 14.62            | 99.30  | 3.053 | 0.000 | 0.986 | 0.000 | 0.000 | 0.000 | 0.001 | 0.092 | 0.867 | 0.096 | 0.001 | 0.903 |
| Line 68  | 123-2-3 | Kfs     | Outer shell       | 65.77            | 0.04             | 17.59                          | 0.00 | 0.00 | 0.00 | 0.02 | 0.79              | 14.85            | 99.10  | 3.072 | 0.001 | 0.968 | 0.000 | 0.000 | 0.000 | 0.001 | 0.072 | 0.885 | 0.075 | 0.001 | 0.924 |
| Line 69  | 123-2-3 | Kfs     | Outer shell       | 65.95            | 0.04             | 17.90                          | 0.00 | 0.00 | 0.00 | 0.04 | 0.89              | 14.68            | 99.53  | 3.065 | 0.002 | 0.980 | 0.000 | 0.000 | 0.000 | 0.002 | 0.081 | 0.870 | 0.085 | 0.002 | 0.913 |
| Line 79  | 123-2-3 | Kfs     | Outer shell       | 66.08            | 0.03             | 17.66                          | 0.21 | 0.00 | 0.00 | 0.04 | 0.75              | 15.25            | 100.05 | 3.058 | 0.001 | 0.963 | 0.008 | 0.000 | 0.000 | 0.002 | 0.067 | 0.900 | 0.069 | 0.002 | 0.929 |
| Line 90  | 123-2-3 | Kfs     | Outer shell       | 64.32            | 0.02             | 18.87                          | 0.02 | 0.00 | 0.01 | 0.01 | 0.97              | 15.01            | 99.28  | 2.987 | 0.001 | 1.033 | 0.001 | 0.000 | 0.001 | 0.001 | 0.087 | 0.889 | 0.089 | 0.001 | 0.910 |
| Line 92  | 123-2-3 | Kfs     | Outer shell       | 64.68            | 0.02             | 19.09                          | 0.03 | 0.03 | 0.01 | 0.05 | 0.88              | 15.13            | 99.90  | 2.987 | 0.001 | 1.039 | 0.001 | 0.001 | 0.000 | 0.002 | 0.078 | 0.891 | 0.081 | 0.002 | 0.917 |
| Line 113 | 123-2-3 | Kfs     | Outer shell       | 65.80            | 0.02             | 18.32                          | 0.06 | 0.00 | 0.01 | 0.02 | 0.84              | 15.04            | 100.13 | 3.038 | 0.001 | 0.997 | 0.002 | 0.000 | 0.001 | 0.001 | 0.075 | 0.886 | 0.078 | 0.001 | 0.921 |
| Line 114 | 123-2-3 | Kfs     | Outer shell       | 66.61            | 0.00             | 18.10                          | 0.00 | 0.00 | 0.00 | 0.03 | 0.92              | 15.01            | 100.68 | 3.058 | 0.000 | 0.979 | 0.000 | 0.000 | 0.000 | 0.002 | 0.082 | 0.879 | 0.085 | 0.002 | 0.913 |
| Line 115 | 123-2-3 | Kfs     | Outer shell       | 66.59            | 0.00             | 18.02                          | 0.03 | 0.00 | 0.02 | 0.02 | 0.88              | 14.87            | 100.45 | 3.067 | 0.000 | 0.978 | 0.001 | 0.000 | 0.001 | 0.001 | 0.079 | 0.874 | 0.083 | 0.001 | 0.917 |
| Line 142 | 123-2-3 | Kfs     | Outer shell       | 66.48            | 0.05             | 17.69                          | 0.08 | 0.00 | 0.00 | 0.03 | 0.69              | 15.33            | 100.34 | 3.068 | 0.002 | 0.962 | 0.003 | 0.000 | 0.000 | 0.001 | 0.062 | 0.903 | 0.064 | 0.001 | 0.935 |
| Line 244 | 123-2-3 | Kfs     | Outer shell       | 64.57            | 0.01             | 18.83                          | 0.00 | 0.00 | 0.00 | 0.06 | 0.81              | 15.16            | 99.52  | 2.996 | 0.000 | 1.030 | 0.000 | 0.000 | 0.000 | 0.003 | 0.073 | 0.897 | 0.075 | 0.003 | 0.922 |

| Number | Sample  | Mineral | Structural domain      | SiO <sub>2</sub> | TiO <sub>2</sub> | Al <sub>2</sub> O <sub>3</sub> | FeO  | MnO  | MgO  | CaO  | Na <sub>2</sub> O | K <sub>2</sub> O | Total | Si    | Al    | Ti    | Fe    | Mn    | Mg    | Ca    | Na    | K     | O  |
|--------|---------|---------|------------------------|------------------|------------------|--------------------------------|------|------|------|------|-------------------|------------------|-------|-------|-------|-------|-------|-------|-------|-------|-------|-------|----|
| 12     | 1-2-2-7 | Crd     | Outer shell and matrix | 49.55            | 0.00             | 30.99                          | 7.35 | 0.18 | 8.20 | 0.02 | 0.83              | 0.22             | 97.37 | 5.212 | 3.839 | 0.000 | 0.647 | 0.016 | 1.286 | 0.002 | 0.169 | 0.030 | 18 |
| 13     | 1-2-2-8 | Crd     | Outer shell and matrix | 51.32            | 0.04             | 31.35                          | 7.82 | 0.13 | 8.24 | 0.00 | 0.30              | 0.02             | 99.22 | 5.265 | 3.788 | 0.003 | 0.671 | 0.011 | 1.260 | 0.000 | 0.060 | 0.003 | 18 |
| 14     | 1-2-2-9 | Crd     | Outer shell and matrix | 50.14            | 0.00             | 31.83                          | 8.13 | 0.11 | 8.53 | 0.01 | 0.37              | 0.00             | 99.15 | 5.144 | 3.845 | 0.000 | 0.697 | 0.010 | 1.304 | 0.001 | 0.074 | 0.000 | 18 |

| Number   | Sample  | Mineral | Structural domain | SiO <sub>2</sub> | TiO <sub>2</sub> | Al <sub>2</sub> O <sub>3</sub> | Fe <sub>2</sub> O <sub>3</sub> | MnO  | MgO  | CaO  | Na <sub>2</sub> O | K <sub>2</sub> O | Total  | Si    | Al    | Ti    | Fe <sup>3+</sup> | Mn    | Mg    | Ca    | Na    | K     | O  |
|----------|---------|---------|-------------------|------------------|------------------|--------------------------------|--------------------------------|------|------|------|-------------------|------------------|--------|-------|-------|-------|------------------|-------|-------|-------|-------|-------|----|
| Line 144 | 123-2-7 | Sil     | Metamorphic core  | 36.89            | 0.00             | 61.67                          | 0.42                           | 0.03 | 0.00 | 0.00 | 0.00              | 0.05             | 99.08  | 4.026 | 7.927 | 0.000 | 0.038            | 0.003 | 0.000 | 0.000 | 0.000 | 0.007 | 20 |
| Line 145 | 123-2-7 | Sil     | Metamorphic core  | 37.41            | 0.00             | 62.32                          | 0.23                           | 0.03 | 0.03 | 0.02 | 0.01              | 0.00             | 100.10 | 4.038 | 7.921 | 0.000 | 0.021            | 0.003 | 0.005 | 0.002 | 0.002 | 0.000 | 20 |
| Line 146 | 123-2-7 | Sil     | Metamorphic core  | 36.91            | 0.04             | 62.52                          | 0.15                           | 0.00 | 0.00 | 0.00 | 0.00              | 0.03             | 99.67  | 3.999 | 7.978 | 0.003 | 0.014            | 0.000 | 0.000 | 0.000 | 0.000 | 0.004 | 20 |
| Line 147 | 123-2-7 | Sil     | Metamorphic core  | 37.03            | 0.00             | 62.51                          | 0.21                           | 0.02 | 0.05 | 0.01 | 0.02              | 0.02             | 99.87  | 4.005 | 7.963 | 0.000 | 0.019            | 0.002 | 0.008 | 0.001 | 0.004 | 0.003 | 20 |
| Line 149 | 123-2-7 | Sil     | Metamorphic core  | 36.87            | 0.02             | 62.74                          | 0.45                           | 0.00 | 0.00 | 0.02 | 0.01              | 0.02             | 100.16 | 3.983 | 7.982 | 0.002 | 0.041            | 0.000 | 0.000 | 0.002 | 0.002 | 0.003 | 20 |
| Line 150 | 123-2-7 | Sil     | Metamorphic core  | 37.16            | 0.00             | 62.08                          | 0.24                           | 0.01 | 0.02 | 0.06 | 0.04              | 0.07             | 99.68  | 4.029 | 7.926 | 0.000 | 0.022            | 0.001 | 0.003 | 0.007 | 0.008 | 0.010 | 20 |
| Line 151 | 123-2-7 | Sil     | Metamorphic core  | 37.15            | 0.00             | 62.45                          | 0.22                           | 0.00 | 0.02 | 0.00 | 0.00              | 0.01             | 99.90  | 4.017 | 7.953 | 0.000 | 0.020            | 0.000 | 0.003 | 0.000 | 0.000 | 0.001 | 20 |
| Line 168 | 123-2-7 | Sil     | Metamorphic core  | 37.45            | 0.04             | 62.26                          | 0.49                           | 0.01 | 0.03 | 0.05 | 0.00              | 0.03             | 100.43 | 4.036 | 7.902 | 0.003 | 0.044            | 0.001 | 0.005 | 0.006 | 0.000 | 0.004 | 20 |
| Line 172 | 123-2-7 | Sil     | Metamorphic core  | 37.89            | 0.01             | 60.50                          | 0.28                           | 0.01 | 0.02 | 0.17 | 0.20              | 0.97             | 100.11 | 4.118 | 7.743 | 0.001 | 0.025            | 0.001 | 0.003 | 0.020 | 0.042 | 0.134 | 20 |

Table DR5 The Hf isotopic data of zircons

| Spots     | Domains                 | 176Hf/177Hf | 1 $\sigma$ | 176Lu/177Hf | 1 $\sigma$ | 176Yb/177Hf | 1 $\sigma$ | Age (Ma) | $\epsilon_{\text{Hf}}(t)$ | $\pm(2s)$ | T <sub>DM1</sub> (Ma) | T <sub>DMC</sub> (Ma) |
|-----------|-------------------------|-------------|------------|-------------|------------|-------------|------------|----------|---------------------------|-----------|-----------------------|-----------------------|
| T123-1-07 | Inherited magmatic core | 0.282292    | 0.000015   | 0.001209    | 0.000034   | 0.030769    | 0.000898   | 500      | -6.7                      | 0.5       | 1.36                  | 1.88                  |
| T123-1-10 | Inherited magmatic core | 0.282498    | 0.000015   | 0.001432    | 0.000043   | 0.038466    | 0.001339   | 500      | 0.5                       | 0.5       | 1.08                  | 1.42                  |
| T123-1-13 | Inherited magmatic core | 0.282409    | 0.000011   | 0.001650    | 0.000091   | 0.042191    | 0.002518   | 500      | -2.7                      | 0.4       | 1.21                  | 1.63                  |
| T123-1-18 | Inherited magmatic core | 0.282234    | 0.000011   | 0.000599    | 0.000029   | 0.015353    | 0.000730   | 500      | -8.5                      | 0.4       | 1.42                  | 2.00                  |
| T123-1-21 | Inherited magmatic core | 0.282393    | 0.000046   | 0.000882    | 0.000027   | 0.023496    | 0.000784   | 500      | -3.0                      | 1.6       | 1.21                  | 1.65                  |
| T123-2-01 | Inherited magmatic core | 0.282376    | 0.000017   | 0.000992    | 0.000038   | 0.025994    | 0.001096   | 500      | -3.7                      | 0.6       | 1.24                  | 1.69                  |
| T123-3-04 | Inherited magmatic core | 0.282440    | 0.000020   | 0.000280    | 0.000029   | 0.007525    | 0.000760   | 500      | -1.2                      | 0.7       | 1.13                  | 1.53                  |
| T123-3-05 | Inherited magmatic core | 0.282292    | 0.000012   | 0.001193    | 0.000029   | 0.030929    | 0.000631   | 500      | -6.7                      | 0.4       | 1.36                  | 1.88                  |
| T123-3-09 | Inherited magmatic core | 0.282463    | 0.000016   | 0.001800    | 0.000049   | 0.045185    | 0.001211   | 500      | -0.9                      | 0.6       | 1.14                  | 1.51                  |
| T123-4-01 | Inherited magmatic core | 0.282343    | 0.000017   | 0.001247    | 0.000033   | 0.031751    | 0.000845   | 500      | -4.9                      | 0.6       | 1.29                  | 1.77                  |
| T123-4-09 | Inherited magmatic core | 0.282288    | 0.000018   | 0.000543    | 0.000012   | 0.014219    | 0.000420   | 500      | -6.6                      | 0.6       | 1.35                  | 1.88                  |
| T123-4-11 | Inherited magmatic core | 0.282479    | 0.000020   | 0.001540    | 0.000091   | 0.040347    | 0.002294   | 500      | -0.2                      | 0.7       | 1.11                  | 1.47                  |
| T123-4-19 | Inherited magmatic core | 0.282426    | 0.000019   | 0.001423    | 0.000013   | 0.034181    | 0.000311   | 500      | -2.1                      | 0.7       | 1.18                  | 1.59                  |
| T123-4-21 | Inherited magmatic core | 0.282234    | 0.000019   | 0.000722    | 0.000038   | 0.016696    | 0.001010   | 500      | -8.6                      | 0.6       | 1.43                  | 2.00                  |
|           |                         |             |            |             |            |             |            |          |                           |           |                       |                       |
| T123-1-01 | Metamorphic mantle      | 0.282490    | 0.000011   | 0.000021    | 0.000000   | 0.000714    | 0.000015   | 24       | -9.9                      | 0.4       | 1.05                  | 1.70                  |
| T123-1-02 | Metamorphic mantle      | 0.282486    | 0.000015   | 0.000578    | 0.000033   | 0.015144    | 0.000703   | 24       | -10.1                     | 0.5       | 1.07                  | 1.71                  |
| T123-1-15 | Metamorphic mantle      | 0.282577    | 0.000013   | 0.000029    | 0.000001   | 0.001063    | 0.000016   | 24       | -6.8                      | 0.5       | 0.93                  | 1.51                  |
| T123-1-16 | Metamorphic mantle      | 0.282507    | 0.000012   | 0.000046    | 0.000002   | 0.001551    | 0.000047   | 24       | -9.3                      | 0.4       | 1.03                  | 1.66                  |
| T123-1-22 | Metamorphic mantle      | 0.282522    | 0.000012   | 0.000101    | 0.000009   | 0.002952    | 0.000255   | 24       | -8.8                      | 0.4       | 1.01                  | 1.63                  |
| T123-1-27 | Metamorphic mantle      | 0.282498    | 0.000011   | 0.000068    | 0.000002   | 0.001883    | 0.000042   | 24       | -9.6                      | 0.4       | 1.04                  | 1.68                  |
| T123-2-05 | Metamorphic mantle      | 0.282218    | 0.000014   | 0.000003    | 0.000000   | 0.000090    | 0.000006   | 24       | -19.5                     | 0.5       | 1.42                  | 2.30                  |
| T123-3-12 | Metamorphic mantle      | 0.282503    | 0.000018   | 0.002110    | 0.000112   | 0.053659    | 0.002956   | 24       | -9.5                      | 0.6       | 1.09                  | 1.68                  |
| T123-4-04 | Metamorphic mantle      | 0.282343    | 0.000015   | 0.000471    | 0.000024   | 0.012171    | 0.000562   | 24       | -15.1                     | 0.5       | 1.27                  | 2.03                  |
| T123-4-07 | Metamorphic mantle      | 0.282342    | 0.000017   | 0.000211    | 0.000004   | 0.005667    | 0.000089   | 24       | -15.1                     | 0.6       | 1.26                  | 2.03                  |
|           |                         |             |            |             |            |             |            |          |                           |           |                       |                       |
| T123-1-03 | Magmatic rim            | 0.282283    | 0.000021   | 0.001017    | 0.000024   | 0.025507    | 0.000536   | 16       | -17.4                     | 0.7       | 1.37                  | 2.16                  |
| T123-1-04 | Magmatic rim            | 0.282500    | 0.000014   | 0.000767    | 0.000023   | 0.018575    | 0.000653   | 16       | -9.7                      | 0.5       | 1.06                  | 1.69                  |
| T123-1-05 | Magmatic rim            | 0.282316    | 0.000014   | 0.000950    | 0.000070   | 0.023656    | 0.001654   | 16       | -16.2                     | 0.5       | 1.32                  | 2.09                  |
| T123-1-12 | Magmatic rim            | 0.282483    | 0.000018   | 0.000510    | 0.000013   | 0.012822    | 0.000284   | 16       | -10.3                     | 0.6       | 1.08                  | 1.72                  |
| T123-1-14 | Magmatic rim            | 0.282507    | 0.000013   | 0.001382    | 0.000028   | 0.032550    | 0.000614   | 16       | -9.5                      | 0.5       | 1.07                  | 1.67                  |
| T123-1-20 | Magmatic rim            | 0.282368    | 0.000013   | 0.000783    | 0.000020   | 0.019759    | 0.000464   | 16       | -14.4                     | 0.5       | 1.24                  | 1.98                  |
| T123-1-23 | Magmatic rim            | 0.282427    | 0.000013   | 0.001410    | 0.000040   | 0.034691    | 0.000863   | 16       | -12.3                     | 0.4       | 1.18                  | 1.85                  |
| T123-1-24 | Magmatic rim            | 0.282353    | 0.000023   | 0.001113    | 0.000071   | 0.027507    | 0.001667   | 16       | -14.9                     | 0.8       | 1.28                  | 2.01                  |
| T123-1-25 | Magmatic rim            | 0.282565    | 0.000033   | 0.001558    | 0.000011   | 0.040826    | 0.000353   | 16       | -7.4                      | 1.2       | 0.99                  | 1.54                  |
| T123-1-26 | Magmatic rim            | 0.282331    | 0.000024   | 0.000723    | 0.000046   | 0.018583    | 0.001146   | 16       | -15.7                     | 0.8       | 1.29                  | 2.06                  |
| T123-2-02 | Magmatic rim            | 0.282329    | 0.000023   | 0.001018    | 0.000018   | 0.026676    | 0.000404   | 16       | -15.8                     | 0.8       | 1.30                  | 2.06                  |
| T123-3-01 | Magmatic rim            | 0.282375    | 0.000027   | 0.000972    | 0.000010   | 0.024804    | 0.000237   | 16       | -14.1                     | 0.9       | 1.24                  | 1.96                  |
| T123-3-02 | Magmatic rim            | 0.282435    | 0.000013   | 0.001171    | 0.000008   | 0.029588    | 0.000096   | 16       | -12.0                     | 0.5       | 1.16                  | 1.83                  |
| T123-3-03 | Magmatic rim            | 0.282381    | 0.000016   | 0.001073    | 0.000024   | 0.026767    | 0.000586   | 16       | -14.0                     | 0.6       | 1.23                  | 1.95                  |
| T123-3-06 | Magmatic rim            | 0.282211    | 0.000013   | 0.000746    | 0.000013   | 0.018286    | 0.000233   | 16       | -20.0                     | 0.5       | 1.46                  | 2.32                  |
| T123-3-07 | Magmatic rim            | 0.282381    | 0.000014   | 0.001200    | 0.000011   | 0.029319    | 0.000174   | 16       | -13.9                     | 0.5       | 1.24                  | 1.95                  |
| T123-3-08 | Magmatic rim            | 0.282302    | 0.000016   | 0.000733    | 0.000033   | 0.018580    | 0.000742   | 16       | -16.7                     | 0.6       | 1.33                  | 2.12                  |
| T123-3-13 | Magmatic rim            | 0.282558    | 0.000012   | 0.000364    | 0.000017   | 0.010786    | 0.000451   | 16       | -7.7                      | 0.4       | 0.97                  | 1.56                  |
| T123-4-02 | Magmatic rim            | 0.282367    | 0.000013   | 0.001019    | 0.000023   | 0.025688    | 0.000482   | 16       | -14.4                     | 0.5       | 1.25                  | 1.98                  |
| T123-4-03 | Magmatic rim            | 0.282348    | 0.000015   | 0.001405    | 0.000022   | 0.035153    | 0.000573   | 16       | -15.1                     | 0.5       | 1.29                  | 2.02                  |
| T123-4-05 | Magmatic rim            | 0.282379    | 0.000018   | 0.000835    | 0.000020   | 0.020983    | 0.000450   | 16       | -14.0                     | 0.6       | 1.23                  | 1.95                  |
| T123-4-06 | Magmatic rim            | 0.282451    | 0.000019   | 0.000670    | 0.000018   | 0.017157    | 0.000518   | 16       | -11.5                     | 0.7       | 1.12                  | 1.79                  |
| T123-4-08 | Magmatic rim            | 0.282334    | 0.000022   | 0.000663    | 0.000004   | 0.016813    | 0.000124   | 16       | -15.6                     | 0.8       | 1.29                  | 2.05                  |
| T123-4-10 | Magmatic rim            | 0.282446    | 0.000018   | 0.000623    | 0.000019   | 0.016157    | 0.000508   | 16       | -11.7                     | 0.6       | 1.13                  | 1.81                  |
| T123-4-12 | Magmatic rim            | 0.282376    | 0.000017   | 0.000665    | 0.000017   | 0.017463    | 0.000429   | 16       | -14.1                     | 0.6       | 1.23                  | 1.96                  |
| T123-4-13 | Magmatic rim            | 0.282390    | 0.000017   | 0.000591    | 0.000006   | 0.015154    | 0.000144   | 16       | -13.6                     | 0.6       | 1.21                  | 1.93                  |
| T123-4-14 | Magmatic rim            | 0.282351    | 0.000023   | 0.000909    | 0.000021   | 0.023168    | 0.000457   | 16       | -15.0                     | 0.8       | 1.27                  | 2.01                  |
| T123-4-15 | Magmatic rim            | 0.282351    | 0.000028   | 0.001307    | 0.000018   | 0.032884    | 0.000414   | 16       | -15.0                     | 1.0       | 1.28                  | 2.01                  |
| T123-4-16 | Magmatic rim            | 0.282362    | 0.000029   | 0.001121    | 0.000034   | 0.028311    | 0.000834   | 16       | -14.6                     | 1.0       | 1.26                  | 1.99                  |
| T123-4-17 | Magmatic rim            | 0.282372    | 0.000027   | 0.001489    | 0.000038   | 0.037161    | 0.000841   | 16       | -14.3                     | 1.0       | 1.26                  | 1.97                  |
| T123-4-20 | Magmatic rim            | 0.282644    | 0.000017   | 0.001683    | 0.000073   | 0.042848    | 0.001942   | 16       | -4.7                      | 0.6       | 0.88                  | 1.36                  |
| T123-4-22 | Magmatic rim            | 0.282442    | 0.000025   | 0.000744    | 0.000020   | 0.018340    | 0.000503   | 16       | -11.8                     | 0.9       | 1.14                  | 1.81                  |
